# Supplementary material
Source: PubMed Central journal article supplement (PMC4313216)
Supplement: JCM.01693-14_zjm999093780so1.pdf [file JCM.01693-14_zjm999093780so1.pdf]

| Dilution of BSE into scrapie brain homogenate |                       |         |          |           |           |            |             |
|-----------------------------------------------|-----------------------|---------|----------|-----------|-----------|------------|-------------|
| BSE isolate                                   | Scrapie isolate       | 1 in 50 | 1 in 250 | 1 in 1600 | 1 in 6000 | 1 in 31000 | 1 in 166000 |
| <b>Caprine BSE</b>                            |                       |         |          |           |           |            |             |
| ARQ/AHQ <sup>a</sup>                          |                       | 2/2     | 2/2      | 2/2       | 1/2       | 0/2        | 0/2         |
| ARQ/AHQ <sup>a</sup>                          | ARQ/ARQ <sup>1</sup>  | 1/2     | 1/2      | 1/2       | 0/2       | 0/2        | 0/2         |
| ARQ/AHQ <sup>a</sup>                          | ARQ/ARQ <sup>2</sup>  | 2/2     | 1/2      | 1/2       | 1/2       | 0/2        | 0/2         |
| ARQ/AHQ <sup>a</sup>                          | VRQ/VRQ <sup>3</sup>  | 2/2     | 2/2      | 2/2       | 1/2       | 0/2        | 0/2         |
| ARQ/AHQ <sup>a</sup>                          | ARQ/AHQ <sup>CH</sup> | 2/2     | 2/2      | 1/2       | 2/2       | 0/2        | 0/2         |
| ARQ/AHQ <sup>a</sup>                          | ARQ/AHQ <sup>At</sup> | 2/2     | 1/2      | 0/2       | 0/2       | 0/2        | 0/2         |
| ARQ/AHQ <sup>b</sup>                          |                       | 2/2     | 2/2      | 2/2       | 1/2       | 0/2        | 0/2         |
| ARQ/AHQ <sup>b</sup>                          | ARQ/ARQ <sup>1</sup>  | 2/2     | 2/2      | 1/2       | 2/2       | 0/2        | 0/2         |
| ARQ/AHQ <sup>b</sup>                          | ARQ/ARQ <sup>2</sup>  | 2/2     | 0/2      | 1/2       | 0/2       | 0/2        | 0/2         |
| ARQ/AHQ <sup>b</sup>                          | VRQ/VRQ <sup>3</sup>  | 2/2     | 2/2      | 2/2       | 2/2       | 0/2        | 0/2         |
| ARQ/AHQ <sup>b</sup>                          | ARQ/AHQ <sup>CH</sup> | 2/2     | 2/2      | 2/2       | 2/2       | 0/2        | 0/2         |
| ARQ/AHQ <sup>b</sup>                          | ARQ/AHQ <sup>At</sup> | 2/2     | 2/2      | 2/2       | 0/2       | 0/2        | 0/2         |
| <b>Ovine BSE</b>                              |                       |         |          |           |           |            |             |
| ARQ/ARQ <sup>c</sup>                          |                       | 2/2     | 2/2      | 2/2       | 2/2       | 0/2        | 0/2         |
| ARQ/ARQ <sup>c</sup>                          | ARQ/ARQ <sup>3</sup>  | 2/2     | 2/2      | 1/2       | 0/2       | 0/2        | 0/2         |
| ARQ/ARQ <sup>c</sup>                          | ARQ/ARQ <sup>4</sup>  | 2/2     | 2/2      | 1/2       | 0/2       | 0/2        | 0/2         |
| ARQ/ARQ <sup>c</sup>                          | VRQ/VRQ <sup>5</sup>  | 2/2     | 2/2      | 1/2       | 0/2       | 0/2        | 0/2         |
| ARQ/ARQ <sup>c</sup>                          | ARQ/AHQ <sup>CH</sup> | 2/2     | 2/2      | 2/2       | 0/2       | 0/2        | 0/2         |
| ARQ/ARQ <sup>c</sup>                          | ARQ/AHQ <sup>At</sup> | 2/2     | 0/2      | 0/2       | 0/2       | 0/2        | 0/2         |
| AHQ/AHQ <sup>d</sup>                          |                       | 2/2     | 1/2      | 2/2       | 1/2       | 0/2        | 0/2         |
| AHQ/AHQ <sup>d</sup>                          | ARQ/ARQ <sup>3</sup>  | 2/2     | 1/2      | 0/2       | 0/2       | 0/2        | 0/2         |
| AHQ/AHQ <sup>d</sup>                          | ARQ/ARQ <sup>4</sup>  | 2/2     | 1/2      | 0/2       | 0/2       | 0/2        | 0/2         |
| AHQ/AHQ <sup>d</sup>                          | VRQ/VRQ <sup>5</sup>  | 2/2     | 1/2      | 1/2       | 1/2       | 0/2        | 0/2         |
| AHQ/AHQ <sup>d</sup>                          | ARQ/AHQ <sup>CH</sup> | 2/2     | 1/2      | 2/2       | 2/2       | 0/2        | 0/2         |
| AHQ/AHQ <sup>d</sup>                          | ARQ/AHQ <sup>At</sup> | 2/2     | 2/2      | 2/2       | 0/2       | 0/2        | 0/2         |

Table 1S: Two different isolates of both caprine (samples a and b) and ovine (samples c and d) BSE (10% w/v brain homogenates) were either amplified either directly or diluted into either caprine or ovine scrapie brain homogenate as indicated, and then subjected to 5 days of sPMCA. Products from these reactions were detected by SHa31 western blot. Recorded are the numbers of positive reactions from a duplicate sPMCA test at each BSE dilution. Scrapie samples 1 and 2 were from caprine infected brain, whilst 3, 4 and 5 were of ovine origin. Scrapie brain denoted by CH was an ovine CH1641 isolate and that denoted At was an atypical ovine isolate.

| BSE sample          | Dilution of 10% w/v BSE in background of scrapie brain homogenates |          |           |           |            |             |
|---------------------|--------------------------------------------------------------------|----------|-----------|-----------|------------|-------------|
|                     | 1 in 50                                                            | 1 in 250 | 1 in 1600 | 1 in 6000 | 1 in 31000 | 1 in 166000 |
| a (caprine)         | 5/5                                                                | 5/5      | 4/5       | 3/5       | 0/5        | 0/5         |
| b (caprine)         | 5/5                                                                | 4/5      | 5/5       | 3/5       | 0/5        | 0/5         |
| c (ovine)           | 5/5                                                                | 4/5      | 4/5       | 0/5       | 0/5        | 0/5         |
| d (ovine)           | 5/5                                                                | 5/5      | 3/5       | 2/5       | 0/5        | 0/5         |
| % positive analyses | 100%                                                               | 90%      | 80%       | 40%       | 0%         | 0%          |

Table 2S: summary of sPMCA analyses of caprine and ovine BSE samples diluted into scrapie brain homogenates. Using the scoring system where a positive amplification is recorded if either 1 or 2 reactions in a duplicate analysis are positive in western blot, the assay demonstrates 100, 90, 80 and 40% sensitivity when BSE brain is diluted at 1/50, 1/250, 1600 and 1/6000 respectively in scrapie positive brain.
